# Supplementary material for: Preparation of chiral 3-oxocycloalkanecarbonitrile and its derivatives by crystallization-induced diastereomer transformation of ketals with chiral 1,2-diphenylethane-1,2-diol
Source: Royal Society of Chemistry journal article supplement (doi:10.1039/c8ra06611f), 2018-01-01

## Supplementary data for the article entitled

### Preparation of chiral 3-oxocycloalkanecarbonitrile and its derivatives by crystallization-induced diastereomer transformation of ketals with chiral 1,2-diphenylethane-1,2-diol

Yohei Yamashita,<sup>\*a,b</sup> Daisuke Maki,<sup>a</sup> Shiho Sakurai,<sup>a</sup> Takumi Fuse,<sup>a</sup> Shoji Matsumoto<sup>a</sup> and Motohiro Akazome<sup>\*a,c</sup>

<sup>a</sup> *Department of Applied Chemistry and Biotechnology, Graduate School of Engineering, Chiba University, 1-33 Yayoicho, Inageku, Chiba 263-8522, Japan*

<sup>b</sup> *Process Chemistry Labs. Pharmaceutical Technology, Astellas Pharma Inc., 160-2, Akahama, Takahagi-shi, Ibaraki 318-0001, Japan*

<sup>c</sup> *Molecular Chirality Research Center, Chiba University, 1-33 Yayoicho, Inageku, Chiba, 263-8522, Japan.*

E-mail address: akazome@faculty.chiba-u.jp, yohei.yamashita@astellas.com

#### Table of Contents

|                                                                                                                                                                                                                                                                                                                                                                          |          |
|--------------------------------------------------------------------------------------------------------------------------------------------------------------------------------------------------------------------------------------------------------------------------------------------------------------------------------------------------------------------------|----------|
| 1. <sup>1</sup> H and <sup>13</sup> C NMR spectra of <b>2a</b> , ( <i>R</i> )- <b>2a</b> , ( <i>S</i> )- <b>2a</b> , <b>2b</b> , <b>3a</b> , ( <i>R</i> )- <b>3a</b> , ( <i>S</i> )- <b>3a</b> , <b>3b</b> , ( <i>R</i> )- <b>3b</b> , ( <i>S</i> )- <b>3b</b> , ( <i>R</i> )- <b>1a</b> , ( <i>R</i> )- <b>1b</b> , ( <i>R</i> )- <b>5a</b> and ( <i>R</i> )- <b>6a</b> | .....S2  |
| 2. Crystallographic data of ( <i>R</i> )- <b>3a</b> , ( <i>S</i> )- <b>3a</b> , ( <i>R</i> )- <b>3b</b> and ( <i>S</i> )- <b>3b</b>                                                                                                                                                                                                                                      | .....S16 |

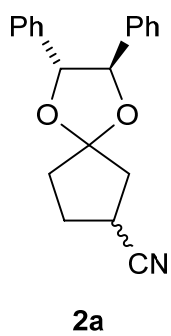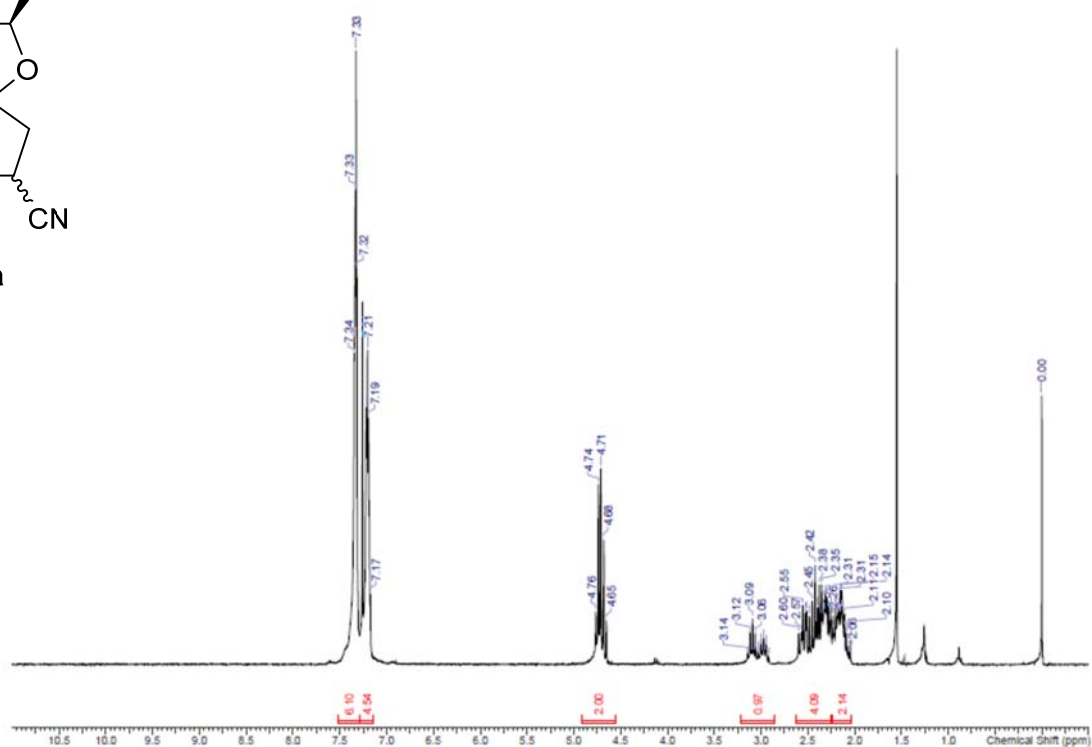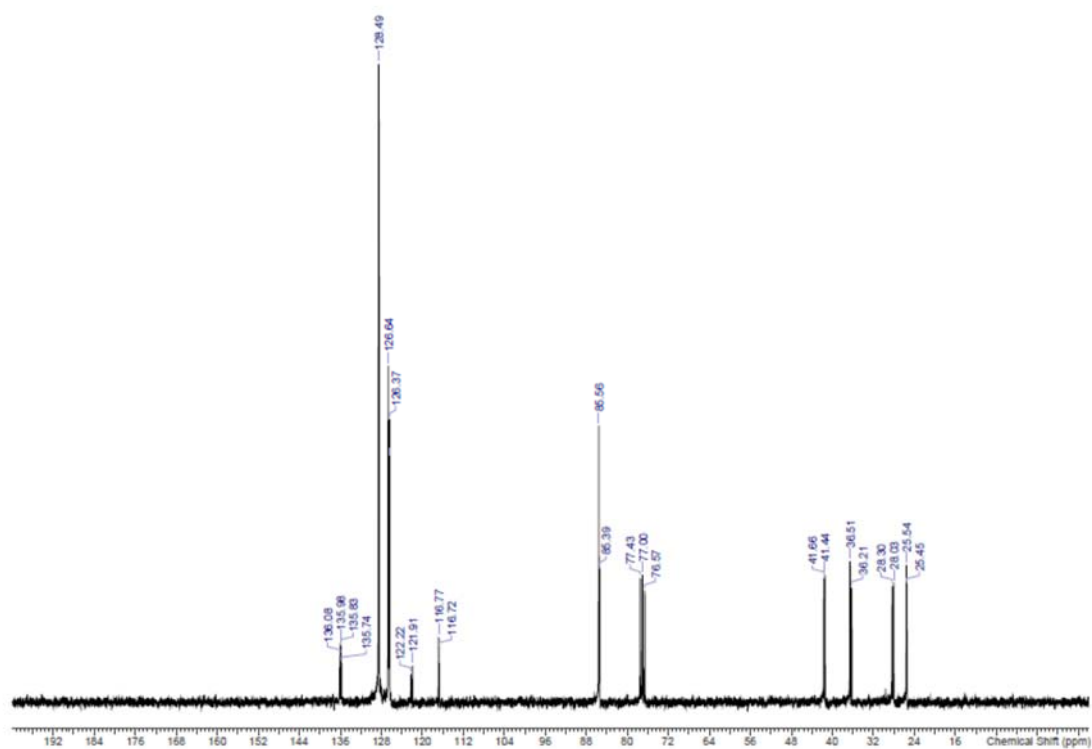

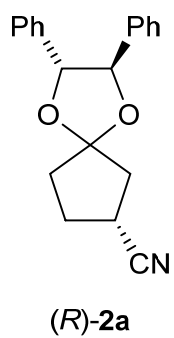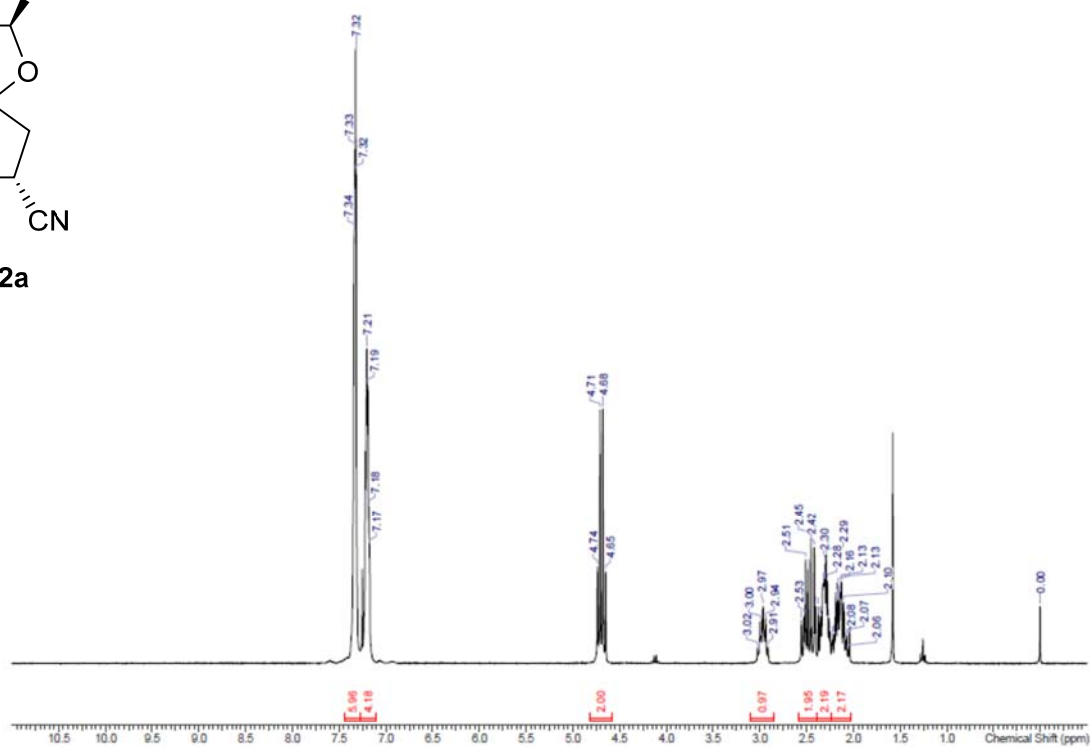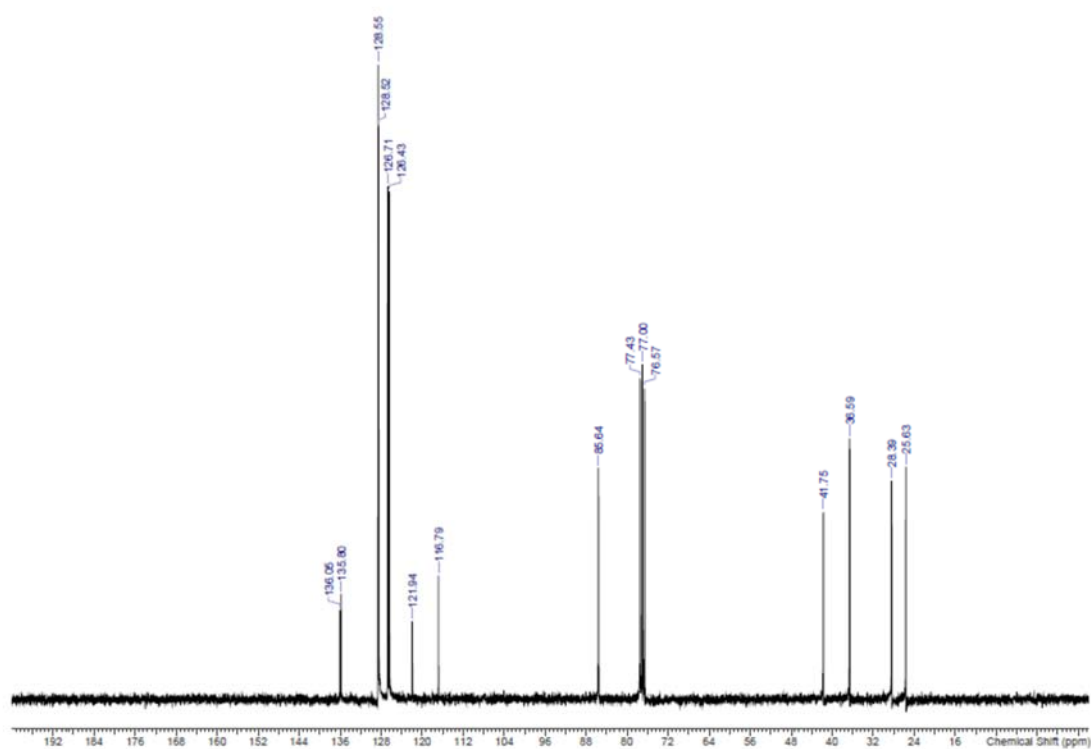

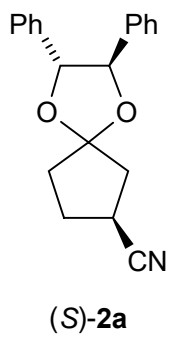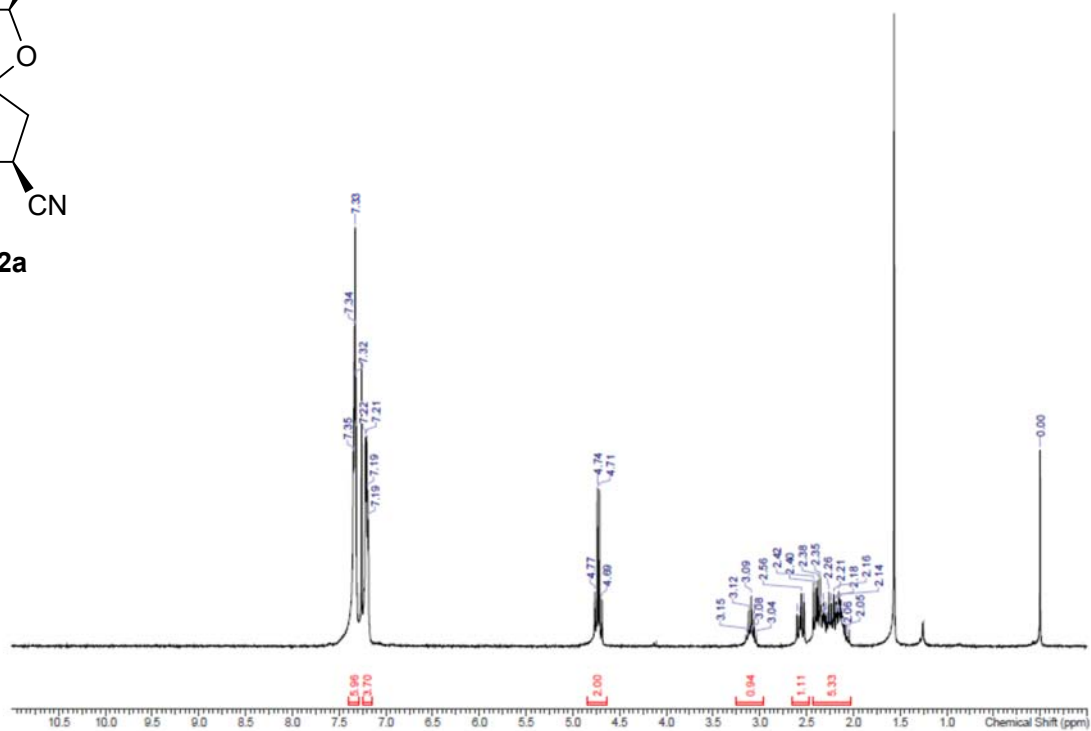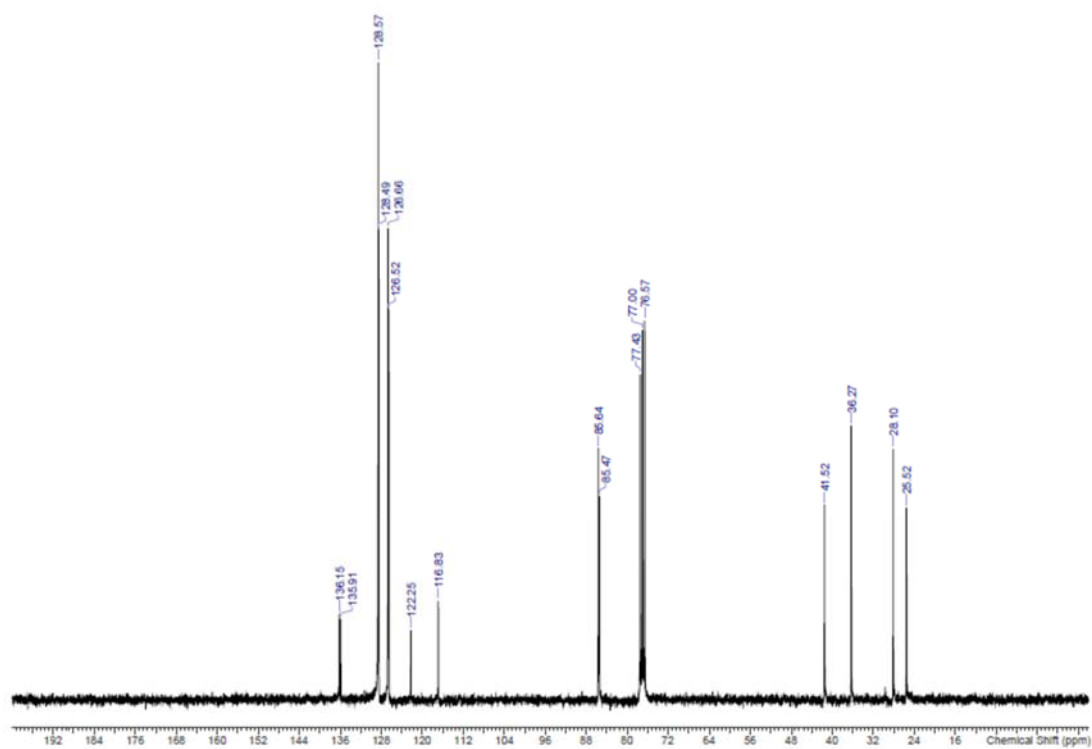

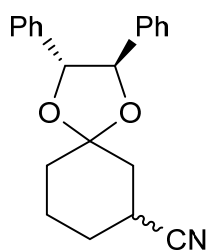

**2b**

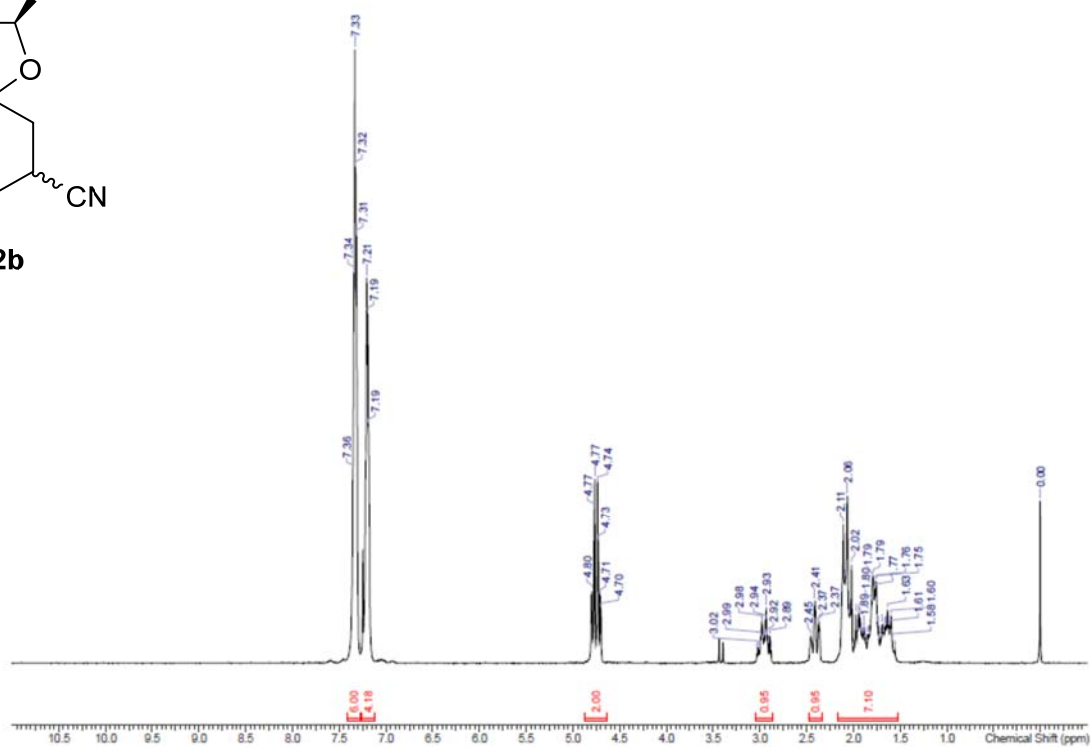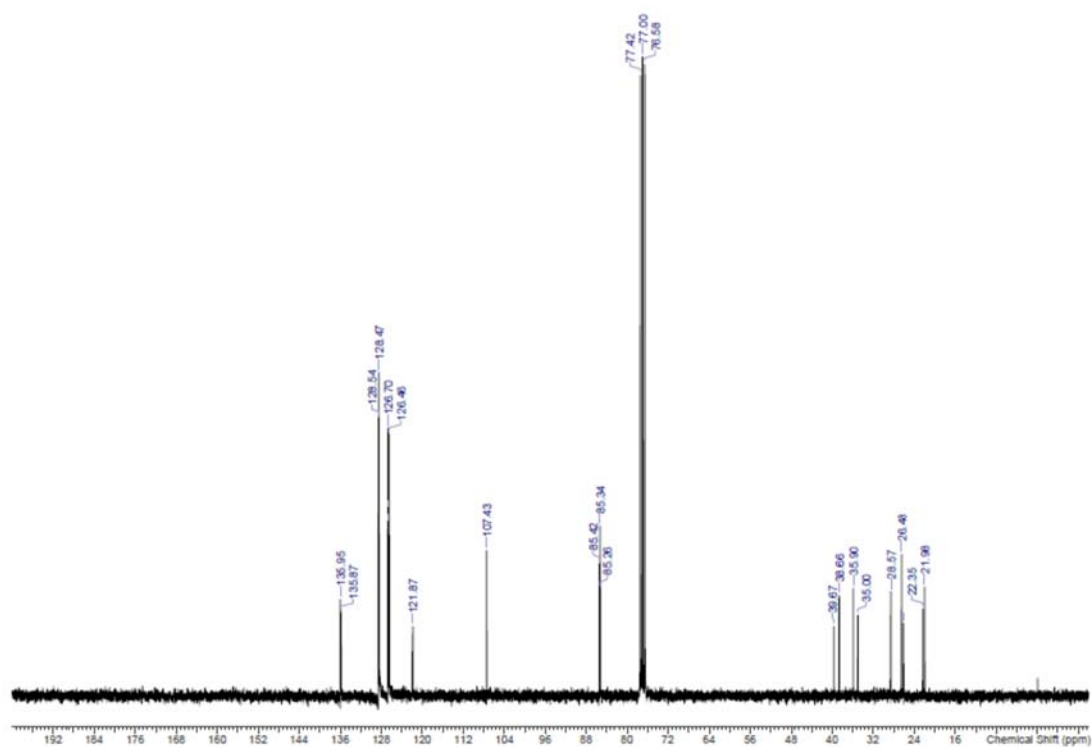

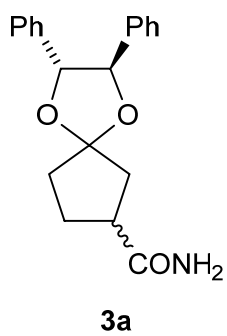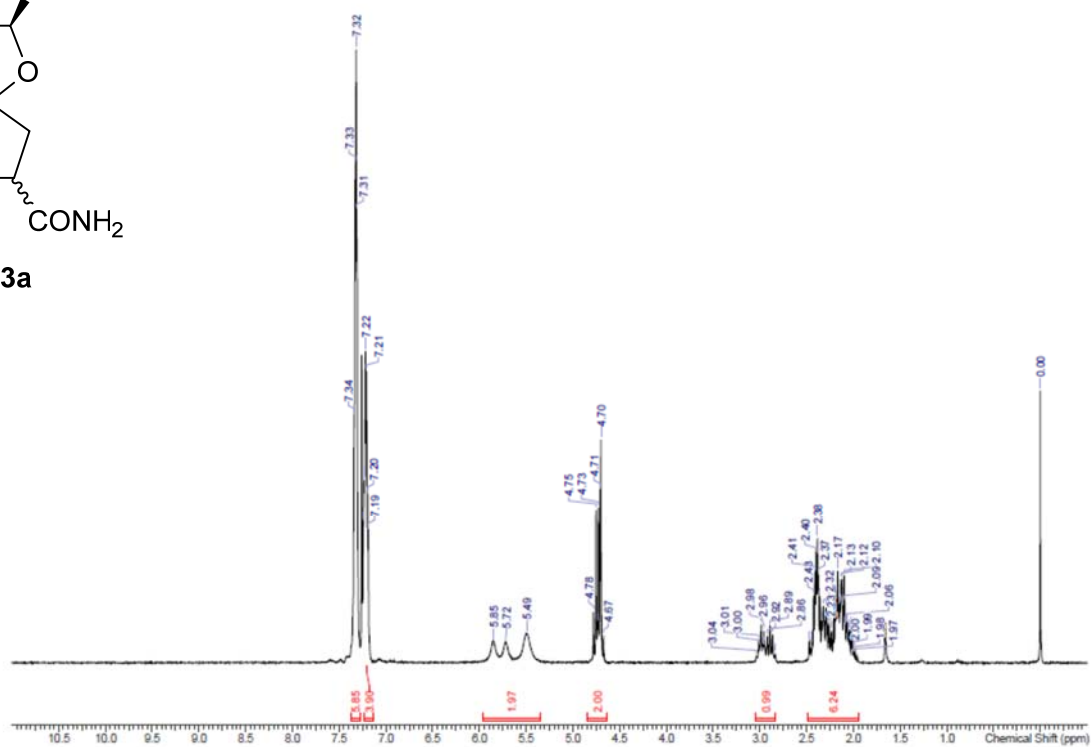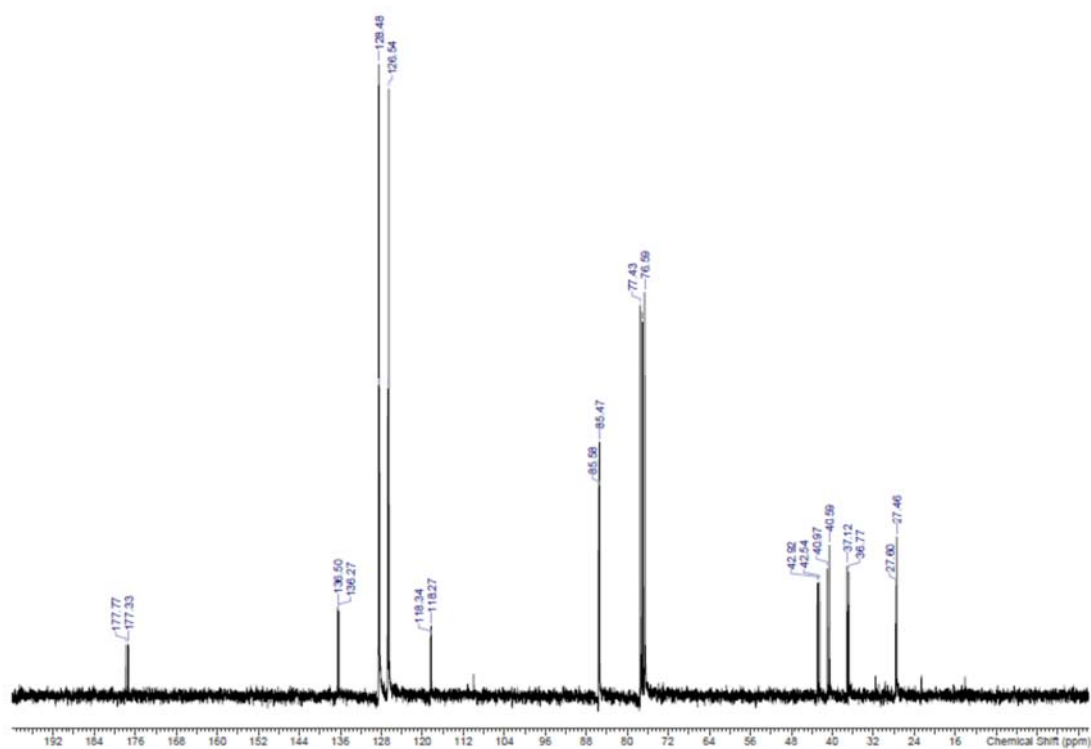

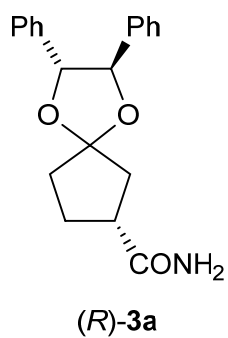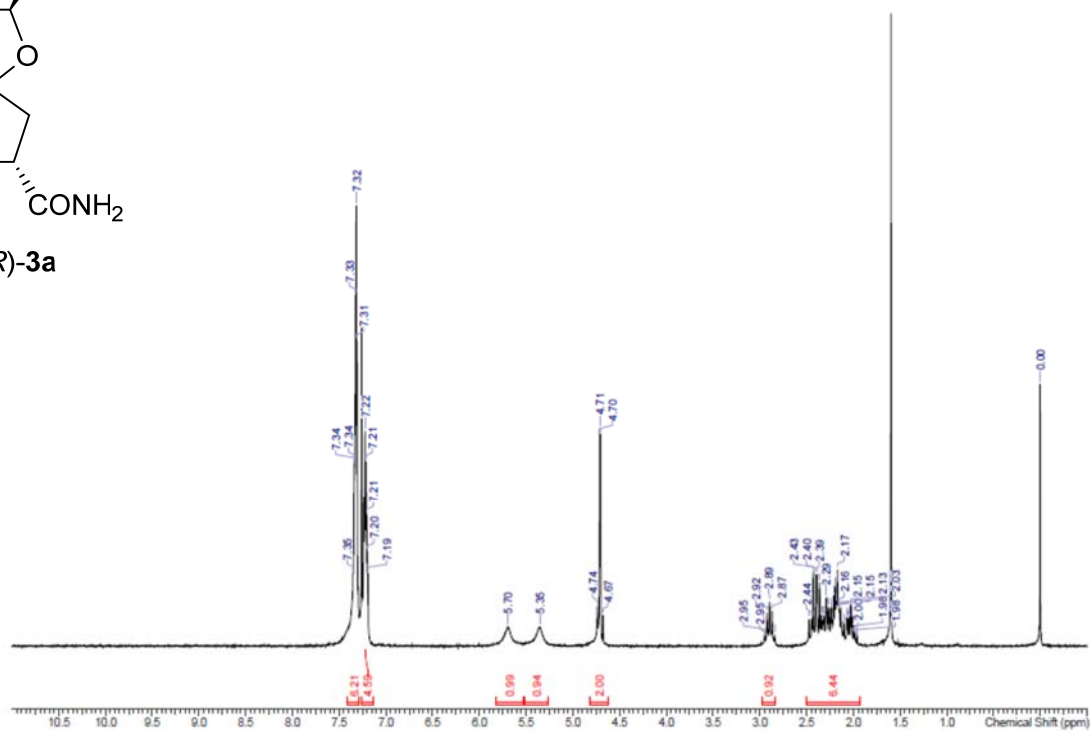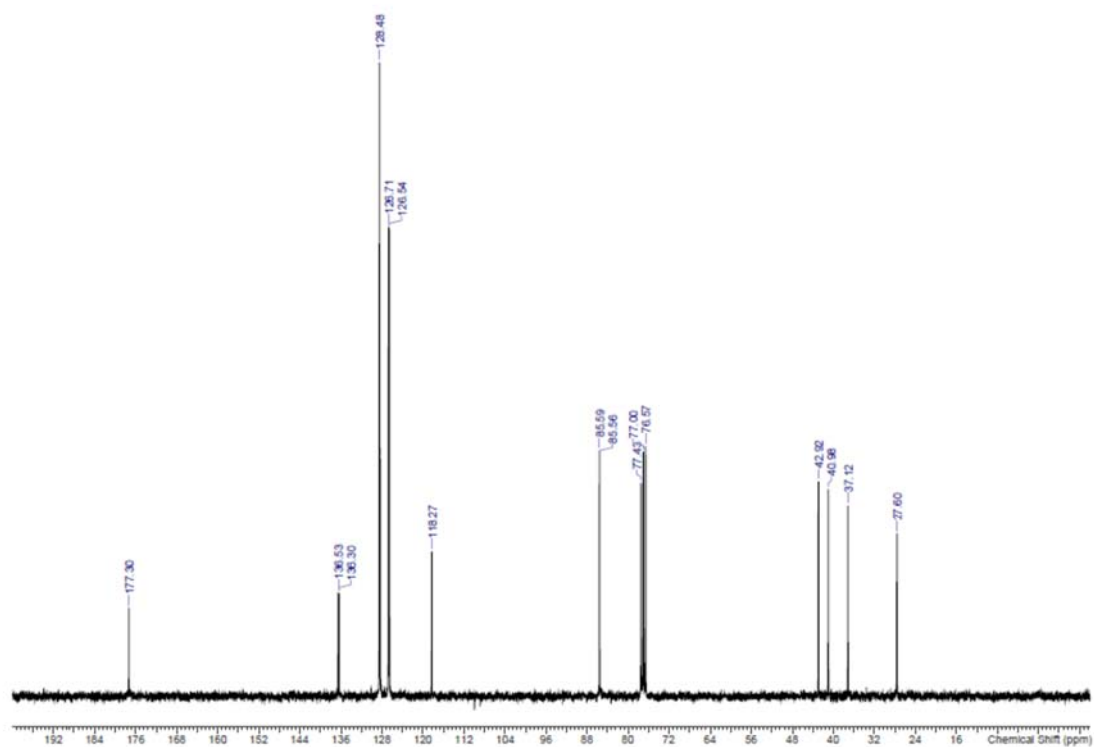

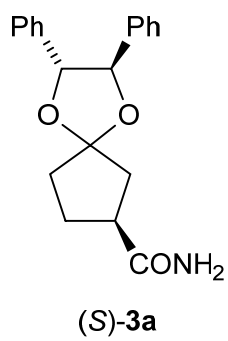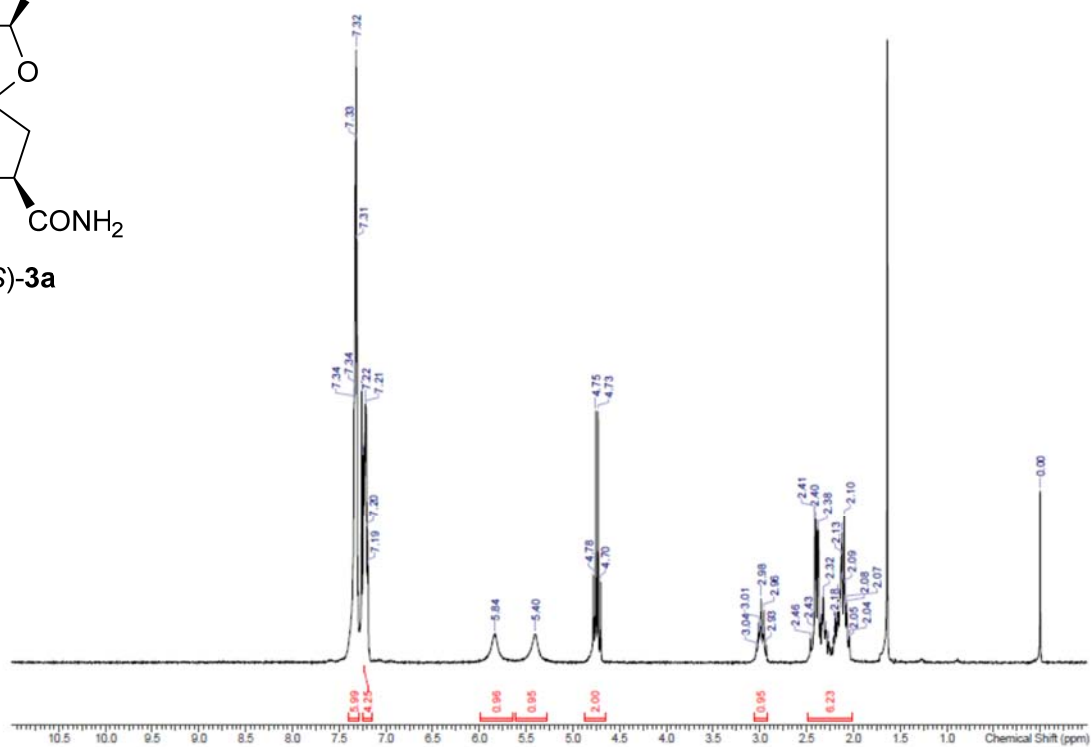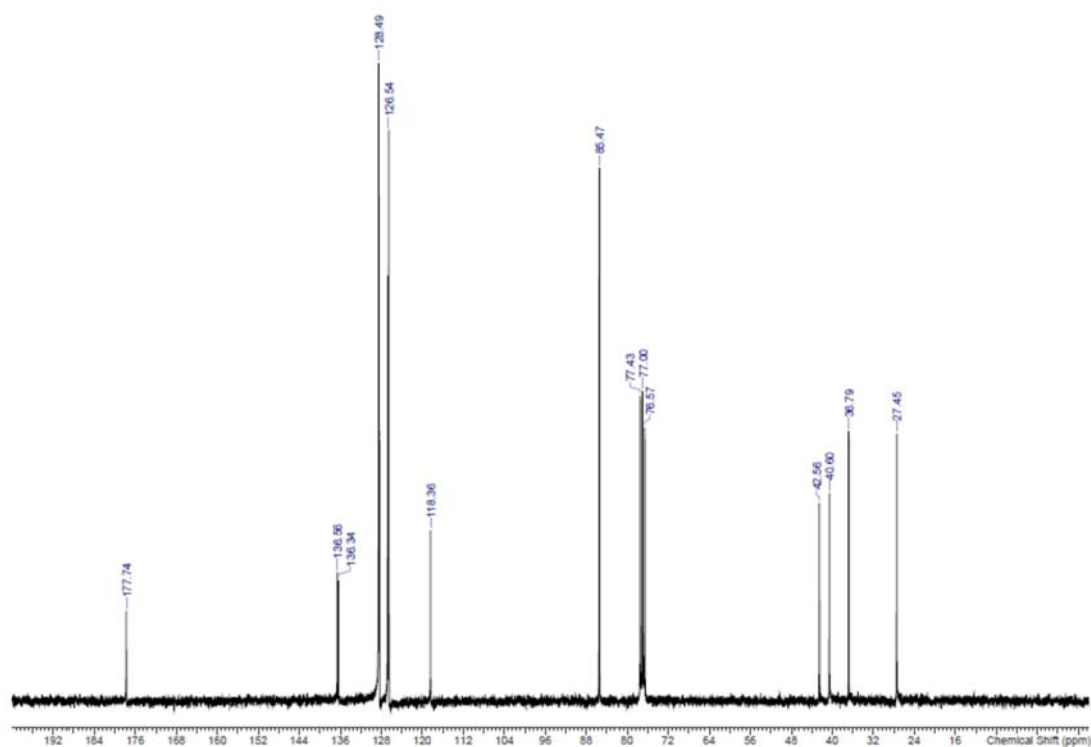



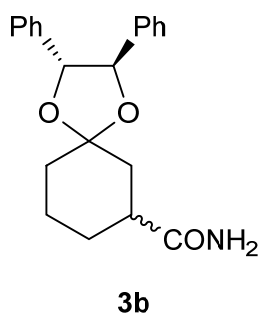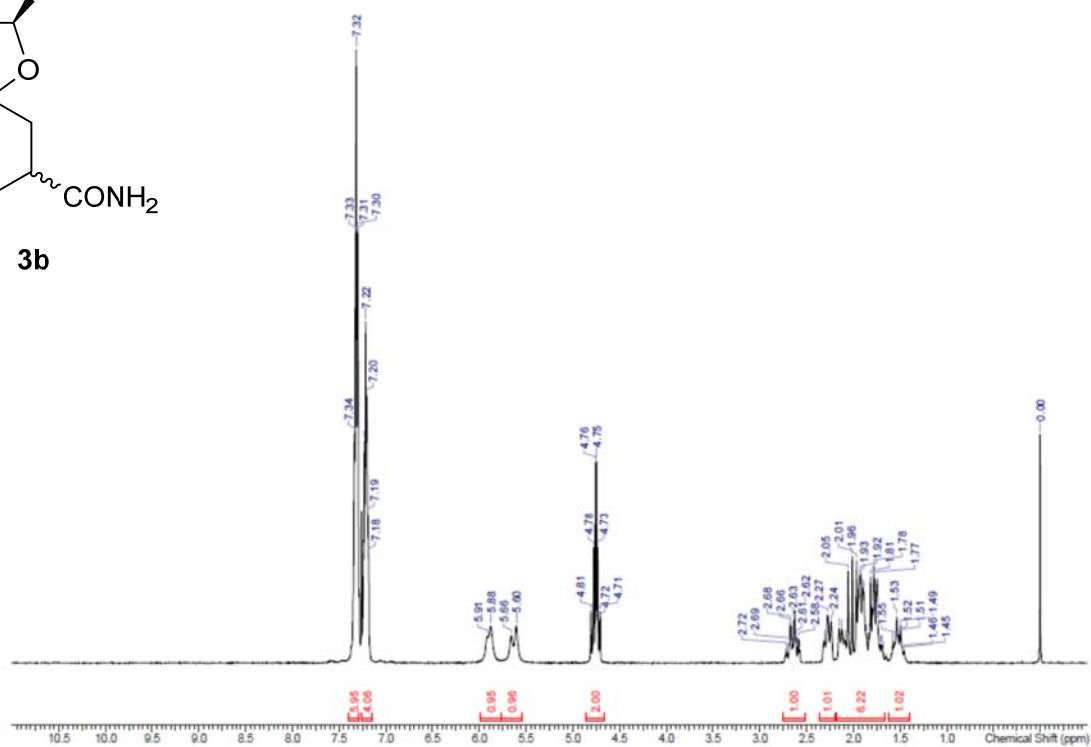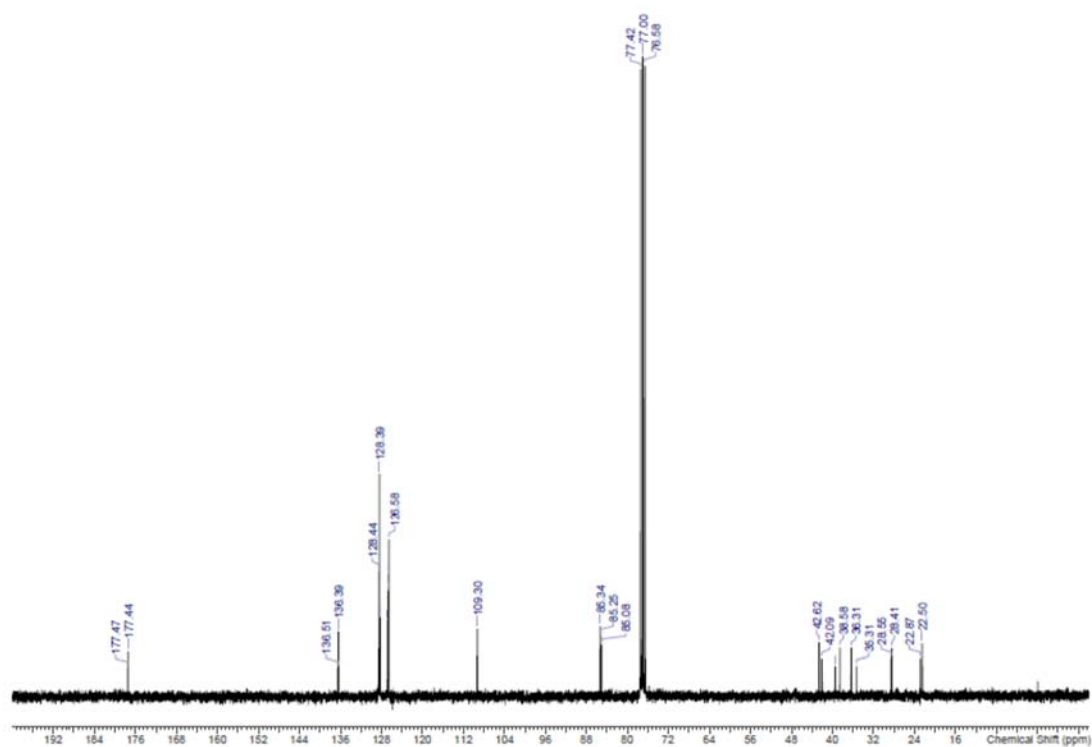

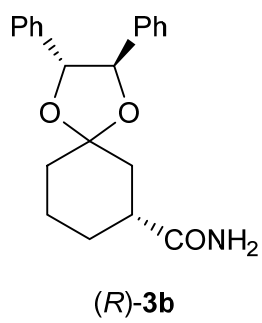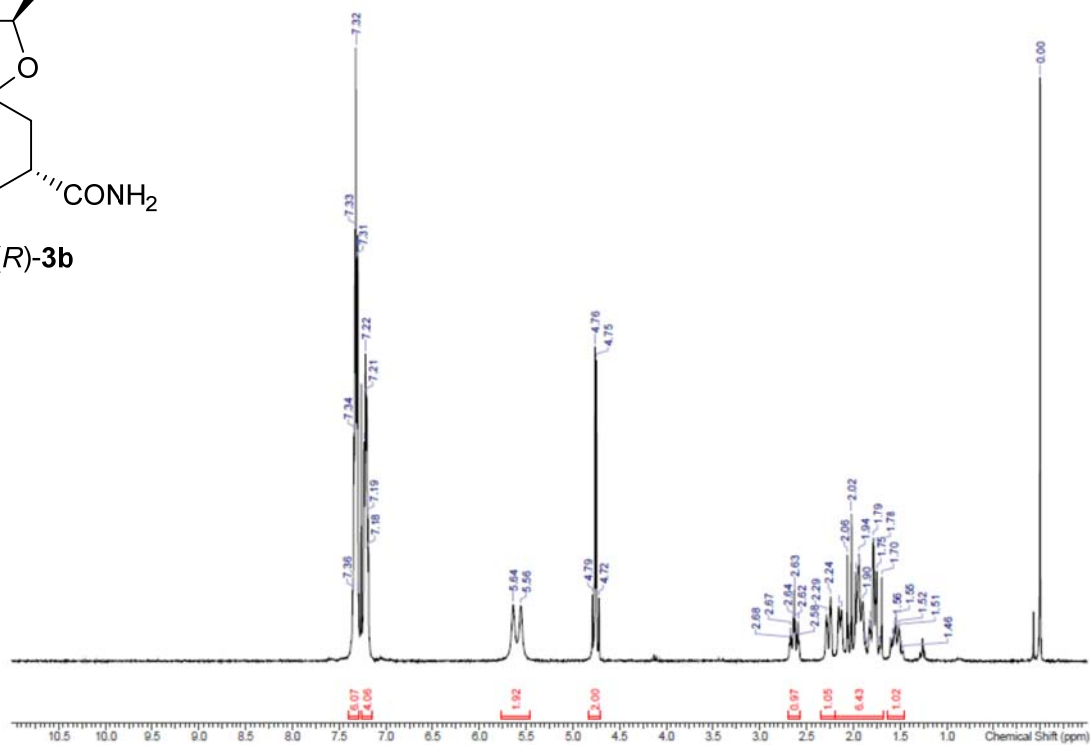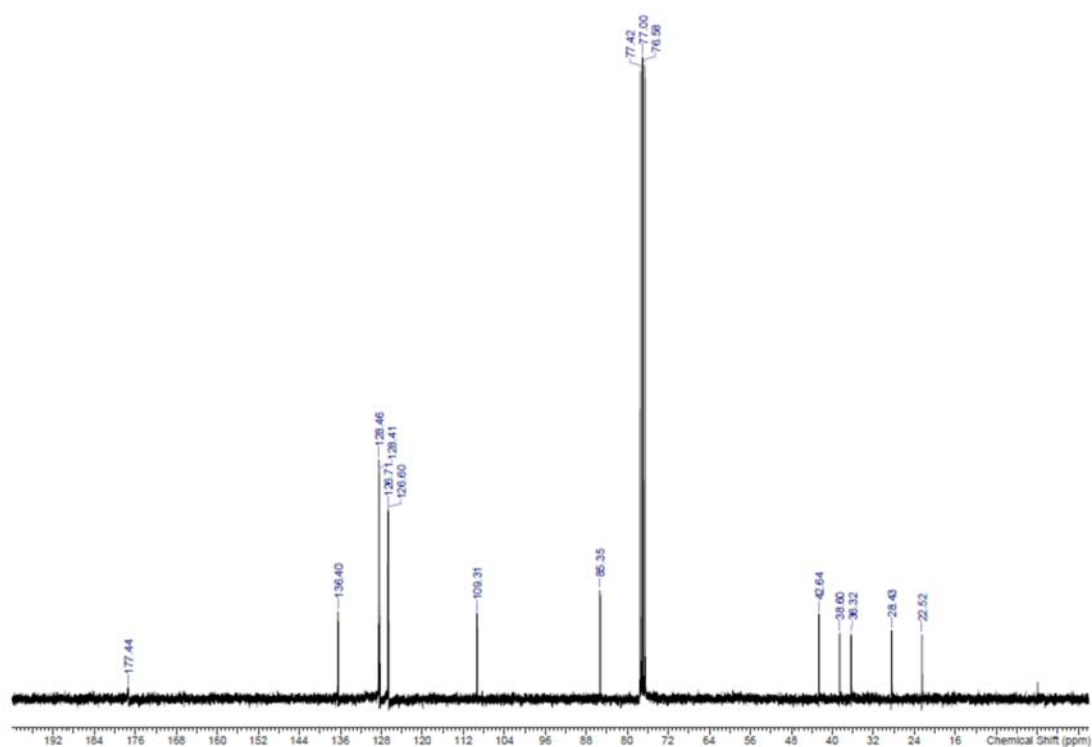

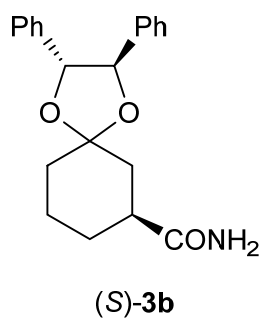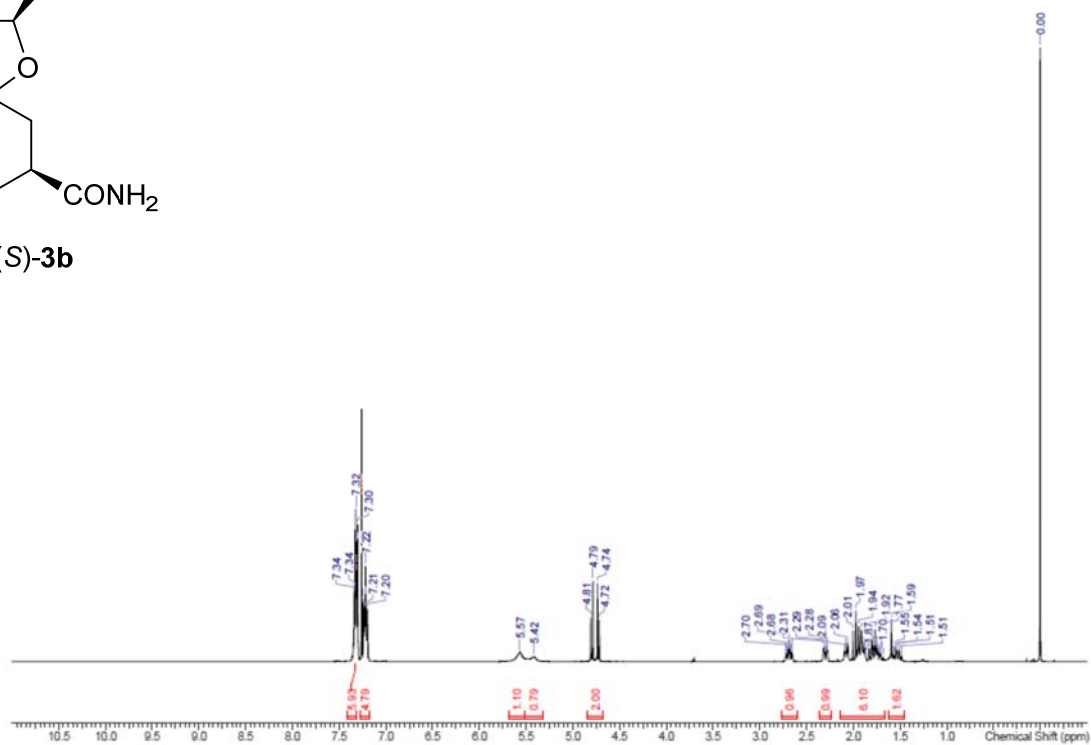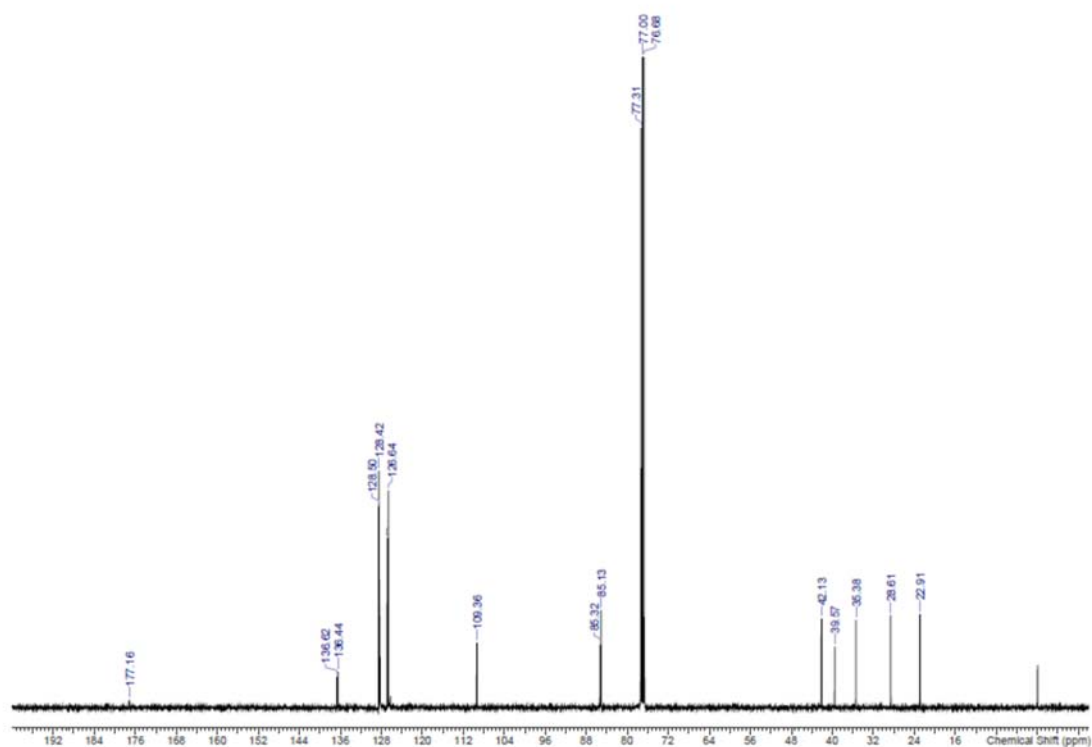

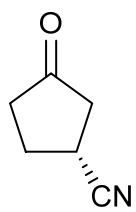

(R)-1a

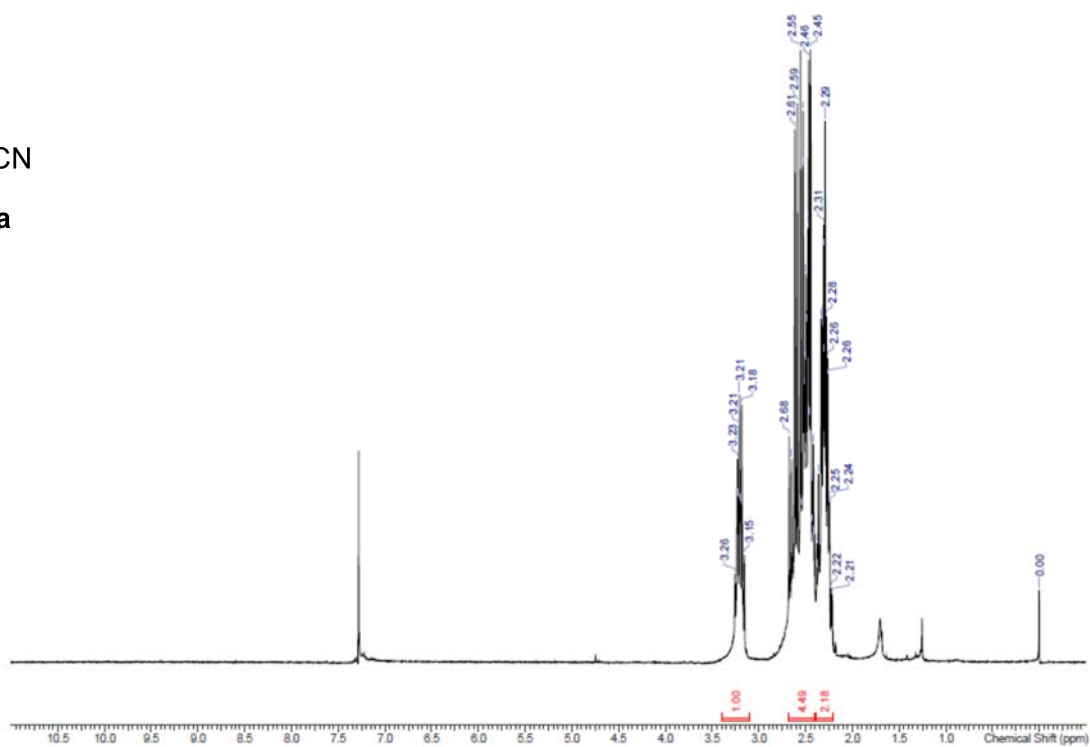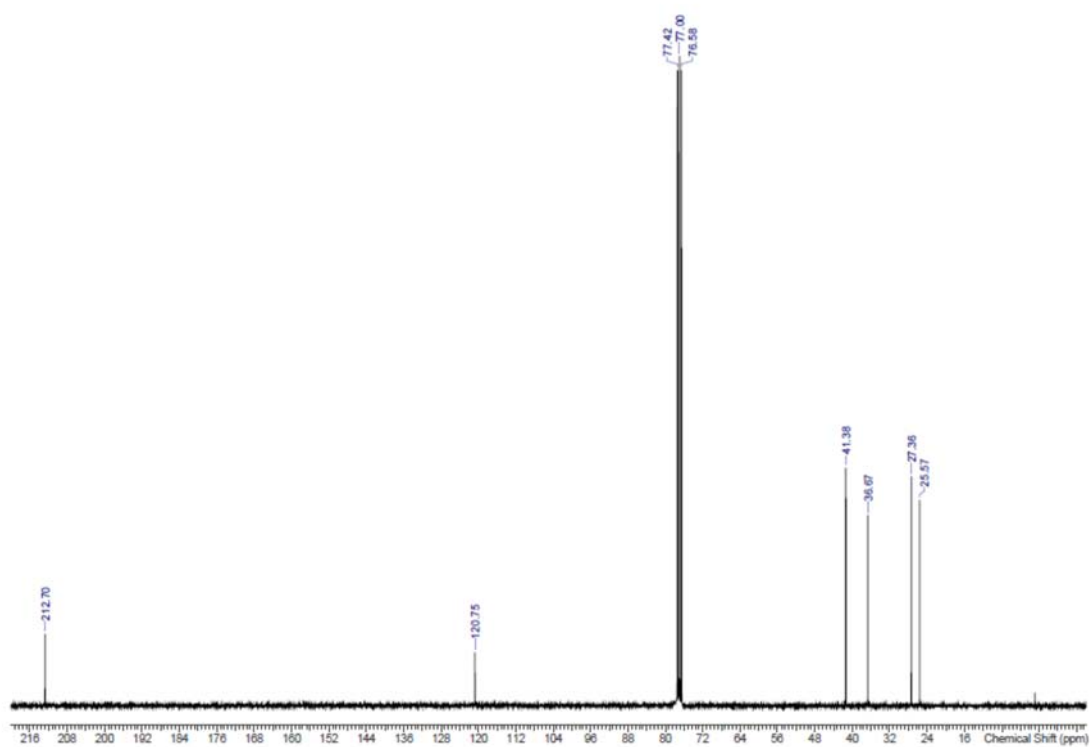

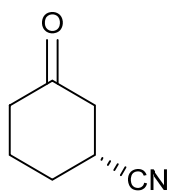

(R)-1b

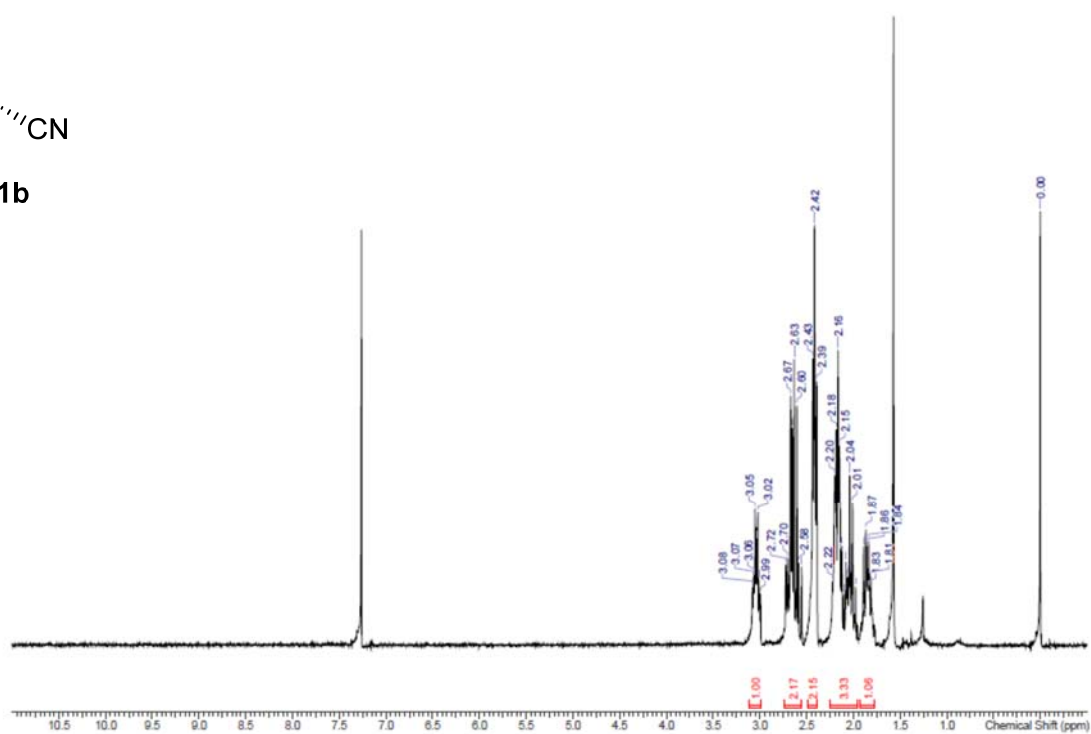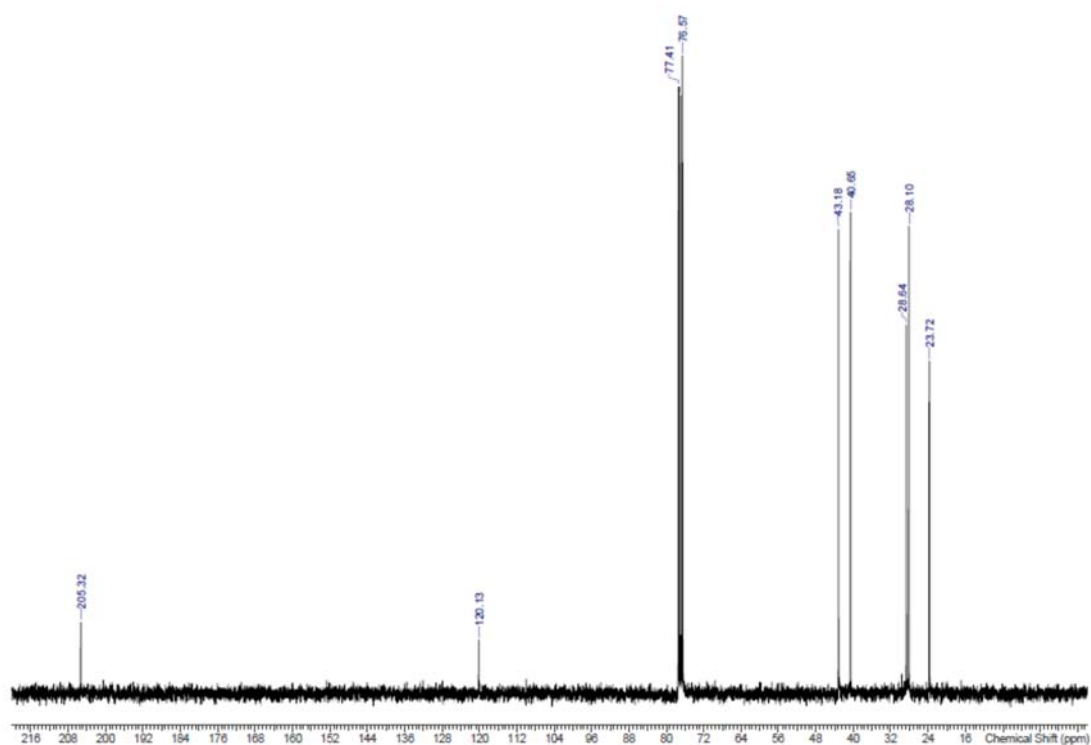

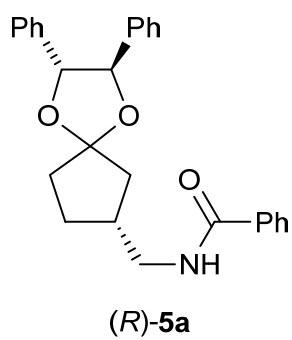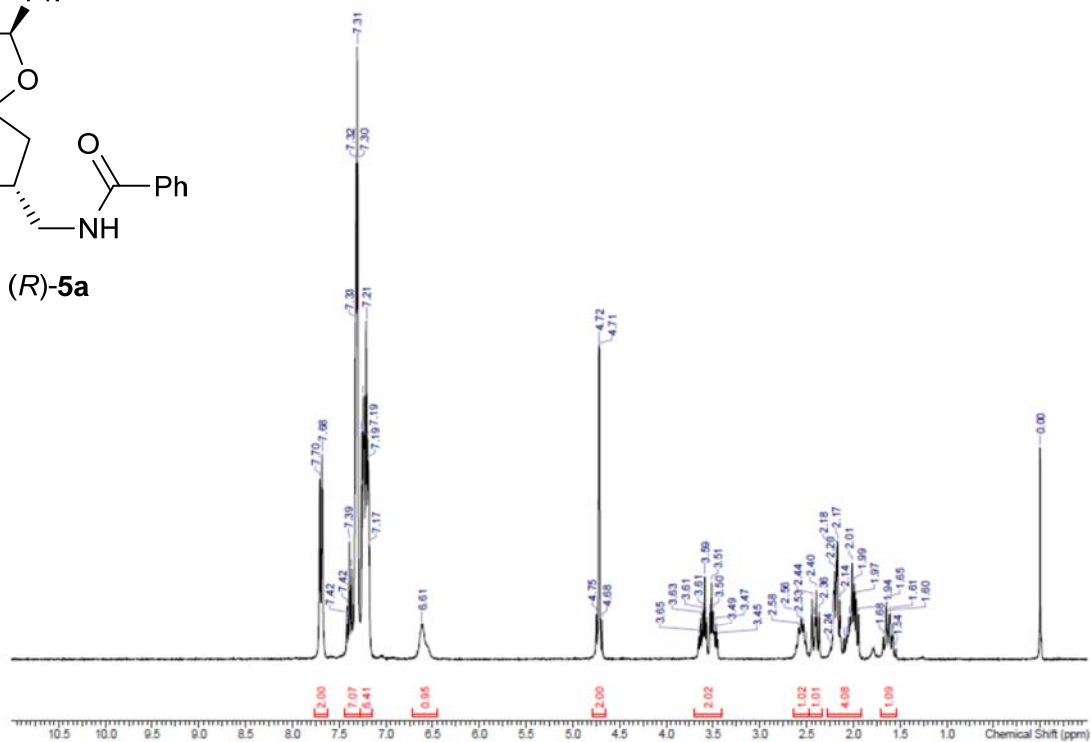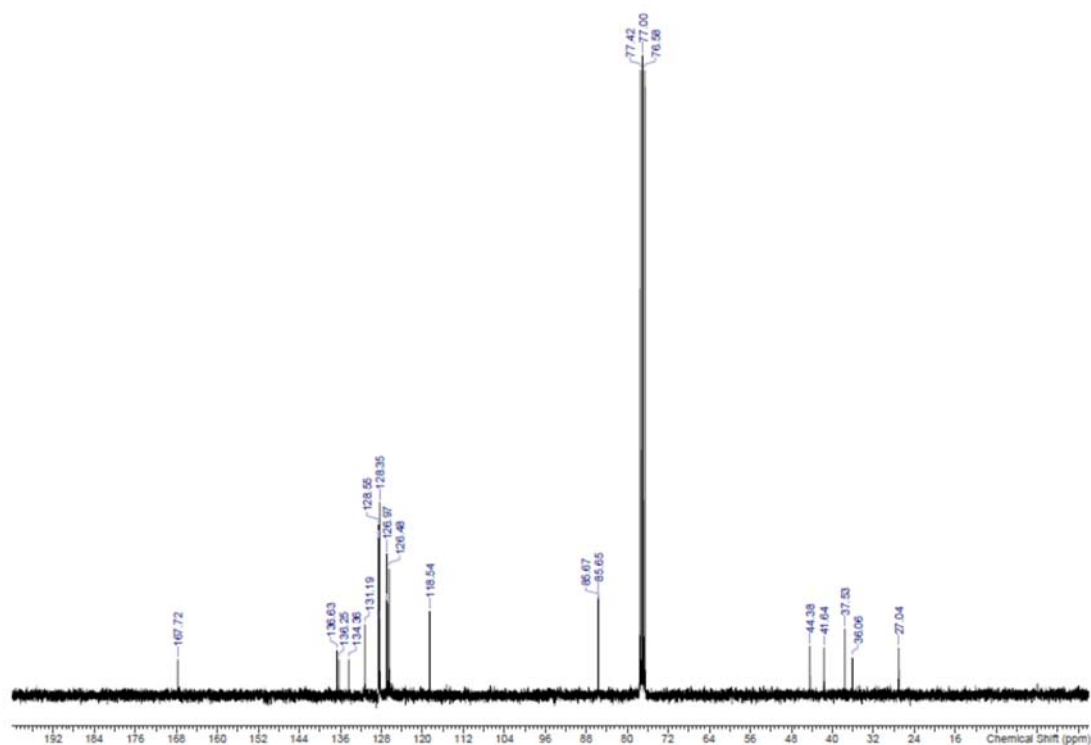

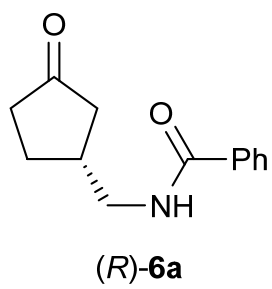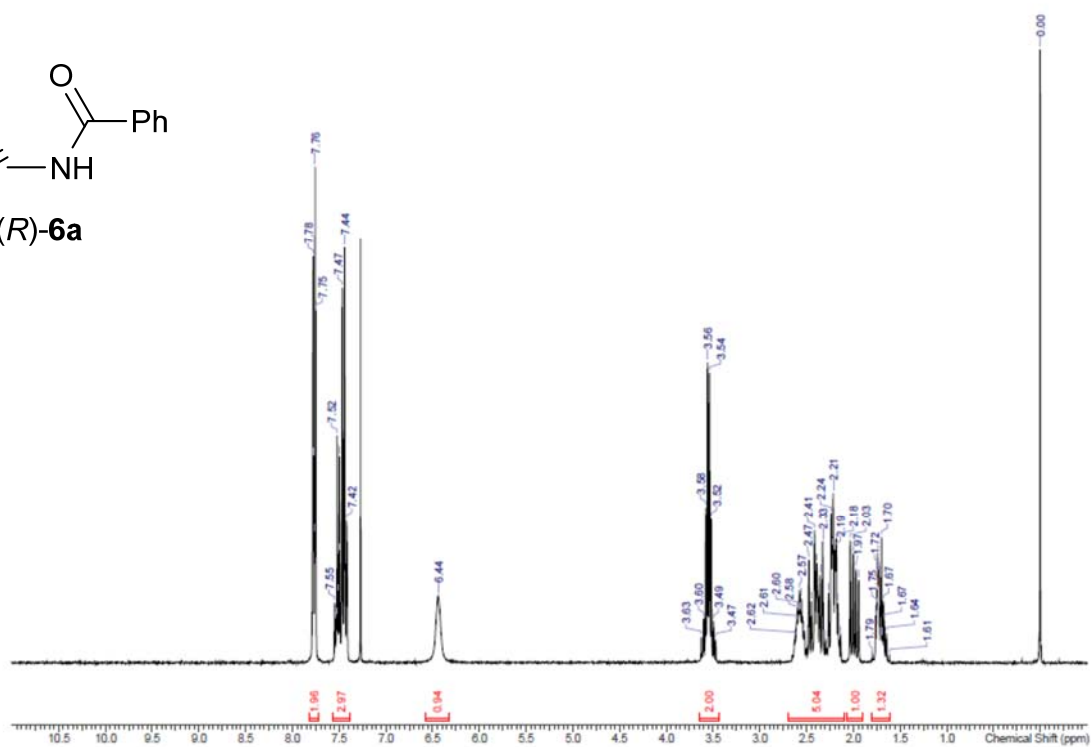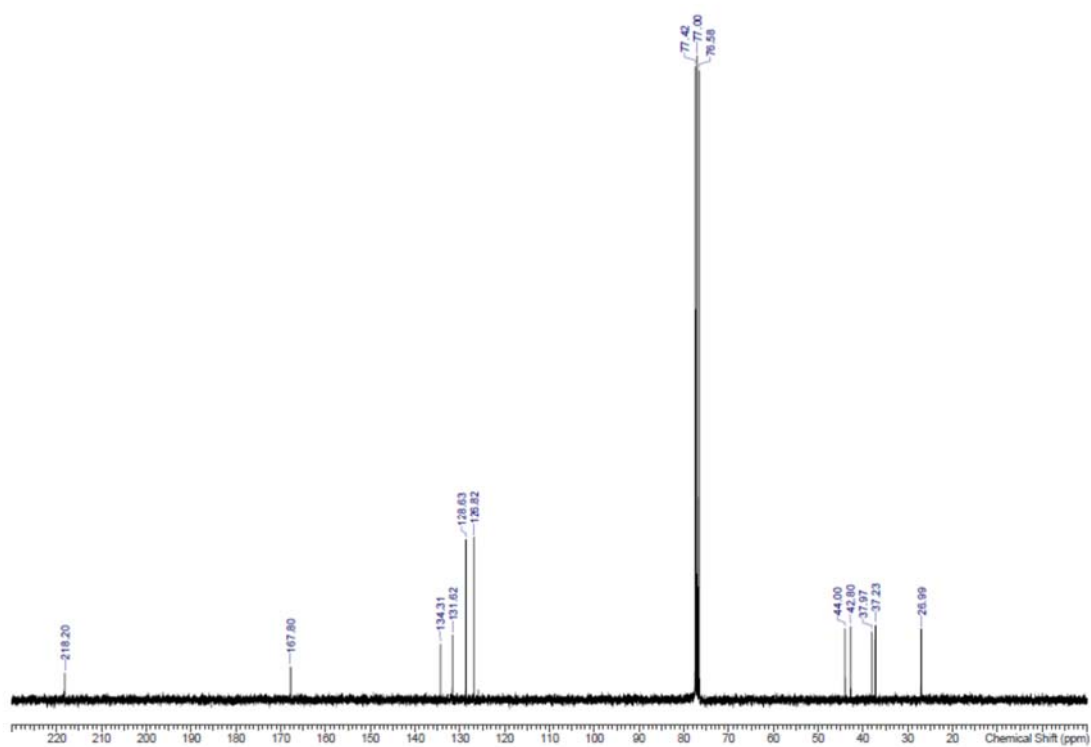

## X-Ray crystal structure determination:

Crystals were grown by recrystallization in chloroform-toluene. Single crystals were mounted on a nylon loop with Paratone-N<sup>®</sup> oil and transferred to the cold gas stream (173 K) of these diffractometers. X-ray crystallographic data of (*R*)-**3a**, (*S*)-**3a**, and (*R*)-**3b** were measured on a Bruker APEXII Ultra CCD diffractometer. Regarding (*S*)-**3b**, the data were collected at a Bruker APEXII CCD diffractometer.

Crystallographic data of (*R*)-**3a** (recrystallized from chloroform-toluene):

C<sub>20</sub>H<sub>21</sub>NO<sub>3</sub>, *M* = 323.38, monoclinic, space group *P*2<sub>1</sub> (no. 4), *a* = 6.2977(2), *b* = 7.4401(2), *c* = 18.2018(6) Å,  $\beta$  = 92.594(2)°, *V* = 851.98(5) Å<sup>3</sup>, *Z* = 2, *T* = 173 K, *D*<sub>c</sub> = 1.261 gcm<sup>-3</sup>,  $\mu$ (Cu-K $\alpha$ ) = 0.680 mm<sup>-1</sup>, *F*(000) = 344, 9149 measured reflections, 2815 independent, *R*(int) = 0.0192, 225 parameters were refined against 2815 reflections, *R*<sub>1</sub> = 0.0304 for 2709 [*I* > 2 $\sigma$ (*I*)] and 0.0317 for all data, *wR*(*F*<sup>2</sup>) = 0.0805 (all data), GOF = 1.073,  $\Delta\rho_{\min}$  and  $\Delta\rho_{\max}$  = -0.158 and 0.216 e.Å<sup>-3</sup>. Flack parameter: 0.15(7) The *R* absolute configuration is assigned by reference to unchanging chiral centers of (1*R*,2*R*)-1,2-diphenylethane-1,2-diol used in the synthetic procedure (ketalization). CCDC 1849794 contains crystallographic data.

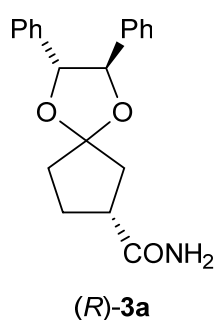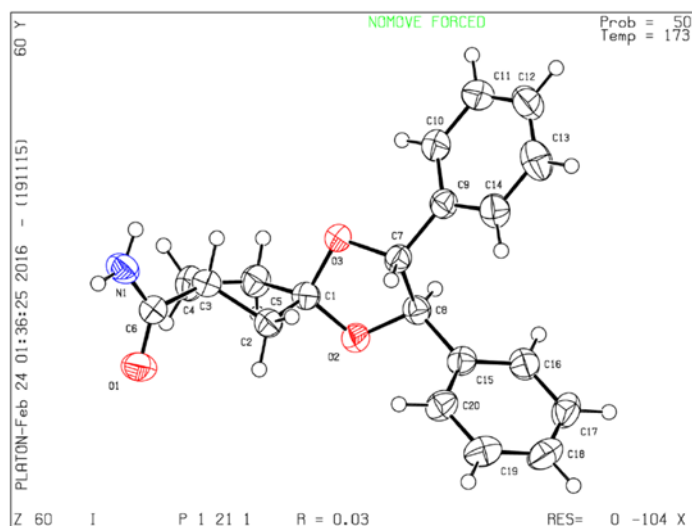



Crystallographic data of (*S*)-**3a** (recrystallized from chloroform-toluene):

C<sub>20</sub>H<sub>21</sub>NO<sub>3</sub>, *M* = 323.38, monoclinic, space group *P*2<sub>1</sub> (no. 4), *a* = 6.2884(3), *b* = 9.3902(5), *c* = 14.9711(7) Å,  $\beta$  = 98.263(2)°, *V* = 874.86(7) Å<sup>3</sup>, *Z* = 2, *T* = 173 K, *D<sub>c</sub>* = 1.228 gcm<sup>-3</sup>,  $\mu$ (Cu-*K*α) = 0.662 mm<sup>-1</sup>, *F*(000) = 344, 8323 measured reflections, 2857 independent, *R*(int) = 0.0218, 225 parameters were refined against 2857 reflections, *R*<sub>1</sub> = 0.0359 for 2790 [*I* > 2σ(*I*)] and 0.0367 for all data, *wR*(*F*<sup>2</sup>) = 0.1005 (all data), GOF = 1.035, Δρ<sub>min</sub> and Δρ<sub>max</sub> = −0.109 and 0.215 e.Å<sup>-3</sup>. Flack parameter: 0.11(7). The *S* absolute configuration is assigned by reference to unchanging chiral centers of (1*R*,2*R*)-1,2-diphenylethane-1,2-diol used in the synthetic procedure (ketalization). CCDC 1849795 contains crystallographic data.

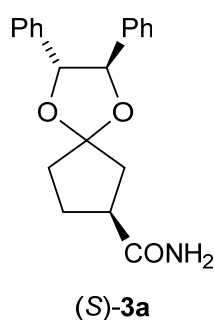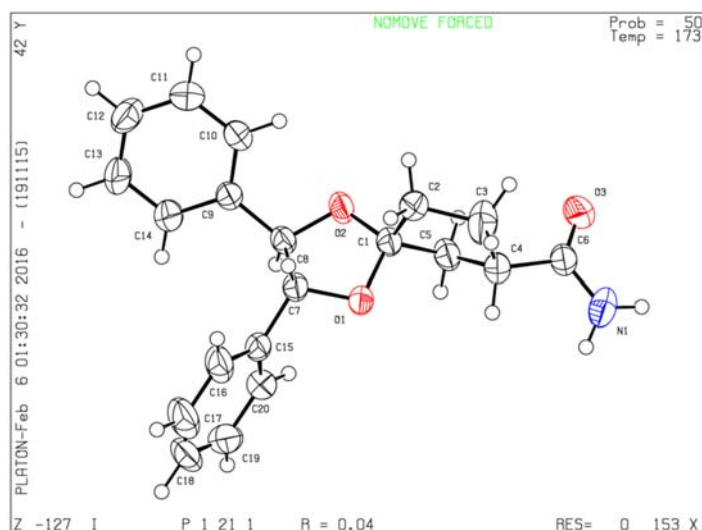

Crystallographic data of (*R*)-**3b** (recrystallized from chloroform-toluene):

C<sub>21</sub>H<sub>23</sub>NO<sub>3</sub>, *M* = 337.40, monoclinic, space group *P*2<sub>1</sub> (no. 4), *a* = 6.4767(4), *b* = 6.7235(5), *c* = 20.8609(14) Å,  $\beta$  = 93.851(4)°, *V* = 906.36(11) Å<sup>3</sup>, *Z* = 2, *T* = 173 K, *D*<sub>c</sub> = 1.236 gcm<sup>-3</sup>,  $\mu$ (Cu-K $\alpha$ ) = 0.659 mm<sup>-1</sup>, *F*(000) = 360, 6157 measured reflections, 2627 independent, *R*(int) = 0.0241, 226 parameters were refined against 2627 reflections, *R*<sub>1</sub> = 0.0386 for 2505 [*I* > 2 $\sigma$ (*I*)] and 0.0408 for all data, *wR*(*F*<sup>2</sup>) = 0.0995 (all data), GOF = 1.073,  $\Delta\rho_{\min}$  and  $\Delta\rho_{\max}$  = -0.133 and 0.193 e.Å<sup>-3</sup>. Flack parameter: 0.26(12). The *R* absolute configuration is assigned by reference to unchanging chiral centers of (1*R*,2*R*)-1,2-diphenylethane-1,2-diol used in the synthetic procedure (ketalization). CCDC 1849796 contains crystallographic data.

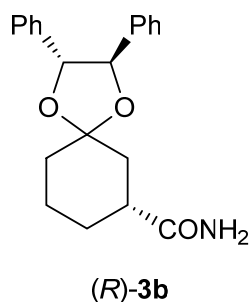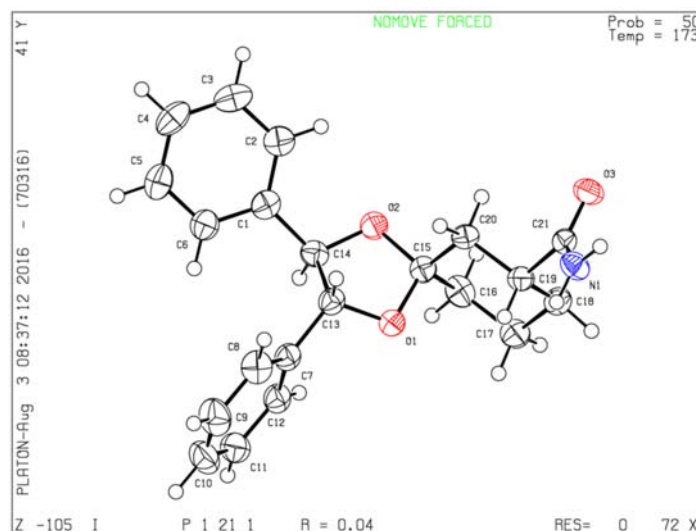

Crystallographic data of (*S*)-**3b** (recrystallized from chloroform-toluene):

C<sub>21</sub>H<sub>23</sub>NO<sub>3</sub>, *M* = 337.40, orthorhombic, space group *P*2<sub>1</sub>2<sub>1</sub>2<sub>1</sub> (no. 19), *a* = 9.5492(9), *b* = 9.6708(9), *c* = 19.5238(18) Å, *V* = 1803.0(3) Å<sup>3</sup>, *Z* = 4, *T* = 173 K, *D*<sub>c</sub> = 1.243 g cm<sup>-3</sup>,  $\mu(\text{Mo-K}\alpha) = 0.083 \text{ mm}^{-1}$ , *F*(000) = 720, 10381 measured reflections, 4108 independent, *R*(int) = 0.0244, 226 parameters were refined against 4108 reflections, *R*<sub>1</sub> = 0.0348 for 3746 [*I* > 2σ(*I*)] and 0.0398 for all data, *wR*(*F*<sup>2</sup>) = 0.0815 (all data), GOF = 1.079, Δρ<sub>min</sub> and Δρ<sub>max</sub> = −0.133 and 0.193 e.Å<sup>-3</sup>. Flack parameter: −0.2(4). The *S* absolute configuration is assigned by reference to unchanging chiral centers of (1*R*,2*R*)-1,2-diphenylethane-1,2-diol used in the synthetic procedure (ketalization). CCDC 1849797 contains crystallographic data.

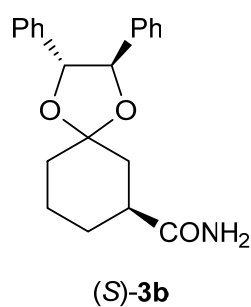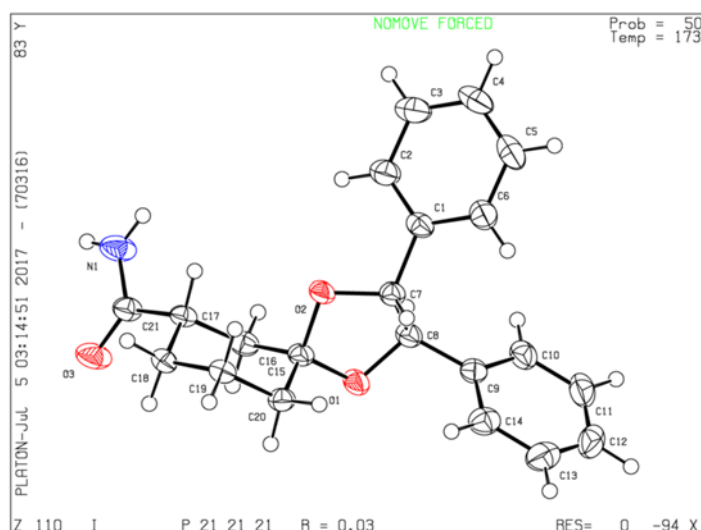

Supplement: c8ra06611f1.pdf [file c8ra06611f1.pdf]
